# Supplementary material for: MiR-155-5p modulates inflammatory phenotype of activated oral lichen-planus-associated-fibroblasts by targeting SOCS1
Source: Research Square preprint supplement (doi:10.21203/rs.3.rs-992702/v1), 2021-10-20
Supplement: Supplementary file 1 [file a121e6cf0e0ec369d11a6b3c.docx]

**Title Page**

**Research Article**

**Title:**

**MiR-155-5p modulates inflammatory phenotype of activated oral lichen-planus-associated-fibroblasts by targeting SOCS1**

**Authors and Affiliations:**

Juehua Cheng1,2,3**†**, Yuyao Zhang1,2,3**†**, Kefan Liu1,2,3, Yanting Wang1,2,3, Juanyong Xu1,2,3, Yuan Fan1,2,3*

1Department of Oral Mucosal Diseases, The Affiliated Stomatological Hospital of Nanjing Medical University, Nanjing, China

2Jiangsu Province Key Laboratory of Oral Diseases, Nanjing Medical University, Nanjing, China

3Jiangsu Province Engineering Research Center of Stomatological Translational Medicine, Nanjing, China

**Authors’ email addresses:**

[907262616@qq.com](mailto:907262616@qq.com)

[18351998965@163.com](mailto:18351998965@163.com)

[liukefan9969@163.com](mailto:liukefan9969@163.com)

[1196471506@qq.com](mailto:1196471506@qq.com)

[905610256@qq.com](mailto:905610256@qq.com)

fanyuan@njmu.edu.cn.

**†Juehua Cheng and Yuyao Zhang contributed equally to this article.**

***Corresponding author:**

**Yuan Fan**, Department of Oral Mucosal Diseases, The Affiliated Stomatological Hospital of Nanjing Medical University, Nanjing, China; E-mail: fanyuan@njmu.edu.cn; TEL: +86-13913910018

**Table S1. Sequences of used primers for RT‑PCR experiments in vitro.**

| **Gene** | **Sequence (5’ to 3’)** |
| --- | --- |
| **Real-time RT-PCR primers** |  |
| has-miR-155-5p-F | 5′- CGCGTTAATGCTAATCGTGATA-3′ |
| has-miR-155-5p-R | 5′-AGTGCAGGGTCCGAGGTATT-3′ |
| U6-F | 5′-CTCGCTTCGGCAGCACA-3′ |
| U6-R | 5′-AACGCTTCACGAATTTGCGT-3′ |
| FAP-α-F | 5′-TGAACGAGTATGTTTGCAGTGG-3′ |
| FAP-α-R | 5′-GGTCTTTGGACAATCCCATGT-3′ |
| GAPDH-F | 5′-ACCACAGTCCATGCCATCAC-3′ |
| GAPDH-R | 5′-TCCACCACCCTGTTGCTGTA- 3′ |

**Table S2. Antibody information.**

| **Reagent** | **Company** | **Catalog No.** | **Application** |
| --- | --- | --- | --- |
| Mouse Anti-Pan Cytokeratin antibody | Bioss | BH0149 | IF,1:300 |
| Rabbit Anti-Vimentin antibody | Bioss | bs-0756R | IF,1:200 |
| CoraLite488 - conjugated Affinipure Goat Anti-Mouse IgG(H+L) | Proteintech | SA00013-1 | IF,1:300 |
| CoraLite594 – conjugated Goat Anti-Rabbit IgG(H+L) | Proteintech | SA00013-4 | IF,1:300 |
| SOCS1 polyclonal antibody | Bioworld | BS71880 | WB, 1:1500 |
| Beta Actin Monoclonal Antibody | Proteintech | 66009-1-lg | WB, 1;10000 |
| HRP-conjugated Affinipure Goat Anti-Rabbit IgG(H+L) | Proteintech | SA00001-2 | WB, 1;10000 |
| HRP-conjugated Affinipure Goat Anti-Mouse IgG(H+L) | Proteintech | SA00001-1 | WB, 1;10000 |
| Anti-SOCS1 antibody | ab9870 | ab9870 | IHC, 1:150 |
| Anti-goat-HRP | ZSGB-BIO | PV-9000 | IHC, 1:50 |
